# Supplementary material for: Electronic structures and magnetic properties of the rare-earth-free permanent magnet α′′-Fe 16 N 2 : first-principles calculations
Source: Royal Society of Chemistry journal article supplement (doi:10.1039/d4tc04934a), 2025-01-01
Supplement: d4tc04934a1.pdf [file d4tc04934a1.pdf]

## Supporting Information

### Electronic structures and magnetic properties of rare-earth-free permanent magnet $\alpha''$ -Fe<sub>16</sub>N<sub>2</sub>: first-principles calculations†

Peirun Duan,<sup>‡a</sup> Qingming Ping,<sup>‡a</sup> Douqiang Sun,<sup>a</sup> Qihang Luo,<sup>a</sup> Haojie Li,<sup>a</sup> Haoyu Xu,<sup>a</sup> Xian Liu,<sup>a</sup>

Xiaohui

Shi<sup>\*a</sup>

and

Lulu

Du<sup>\*a</sup>

---

<sup>a</sup>*School of Physics and Electronic Engineering, Linyi University, Linyi 276000, China*

<sup>\*</sup> Author to whom all correspondence should be addressed

<sup>\*</sup> E-mail: shixiaohui@lyu.edu.cn;

<sup>\*</sup> E-mail: dululu@lyu.edu.cn

<sup>†</sup> Electronic supplementary information (ESI) available.

<sup>‡</sup> These two authors contributed equally to this work.



## S1. The dynamical stability of $\alpha''$ -Fe<sub>16</sub>N<sub>2</sub>

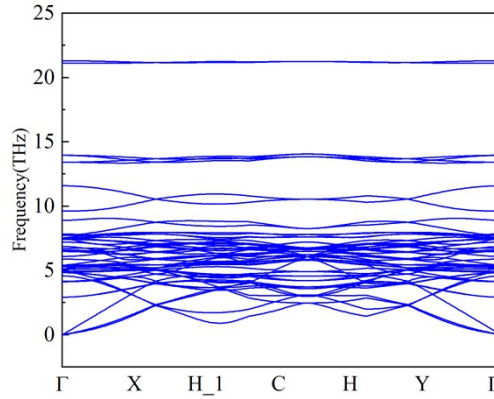

Fig. S1 Phonon dispersion curves of  $\alpha''$ -Fe<sub>16</sub>N<sub>2</sub>.

## S2. Projected density of states of $\alpha''$ -Fe<sub>16</sub>N<sub>2</sub>

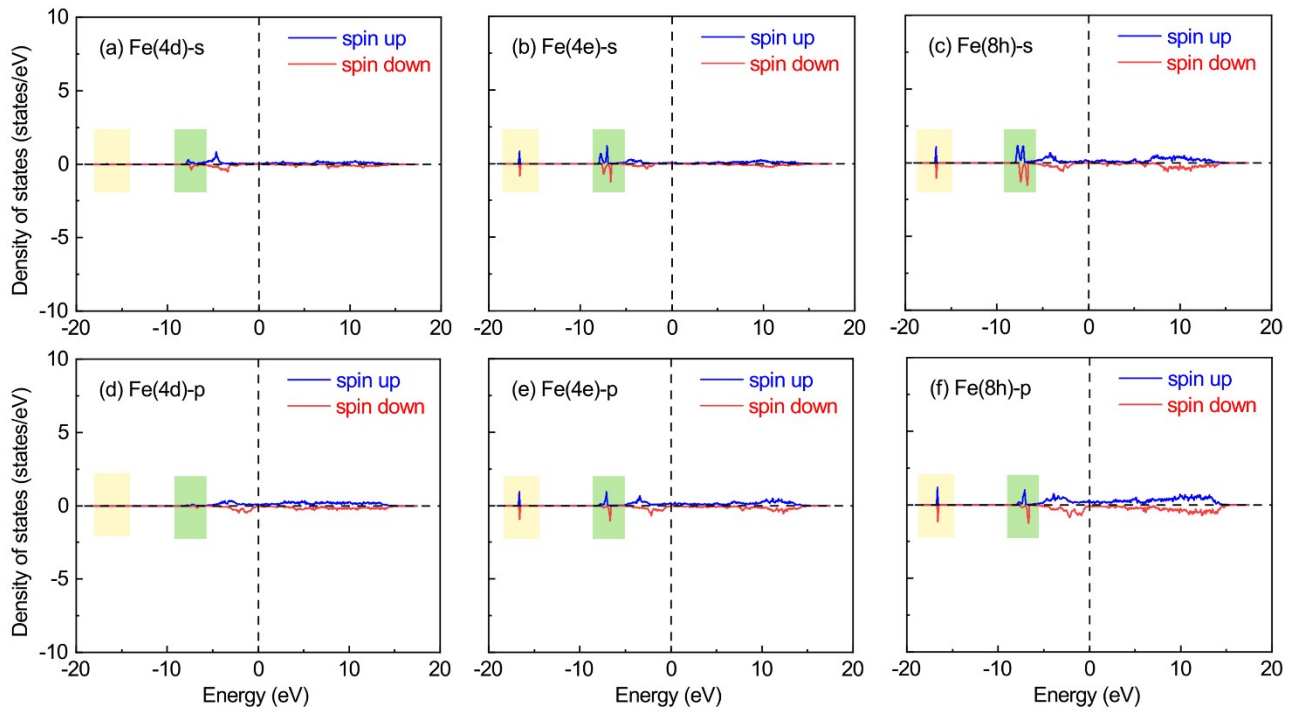

Fig. S2 Spin-polarized site-projected density of states of *s* orbit (a)Fe(4d)-*s*, (b)Fe(4e)-*s*, (c)Fe(8h)-*s*, and projected density of states of *p* orbit(d)Fe(4d)-*p*, (e)Fe(4e)-*p* and (f)Fe(8h)-*p*.

### S3. The band of $\gamma'$ -Fe<sub>4</sub>N

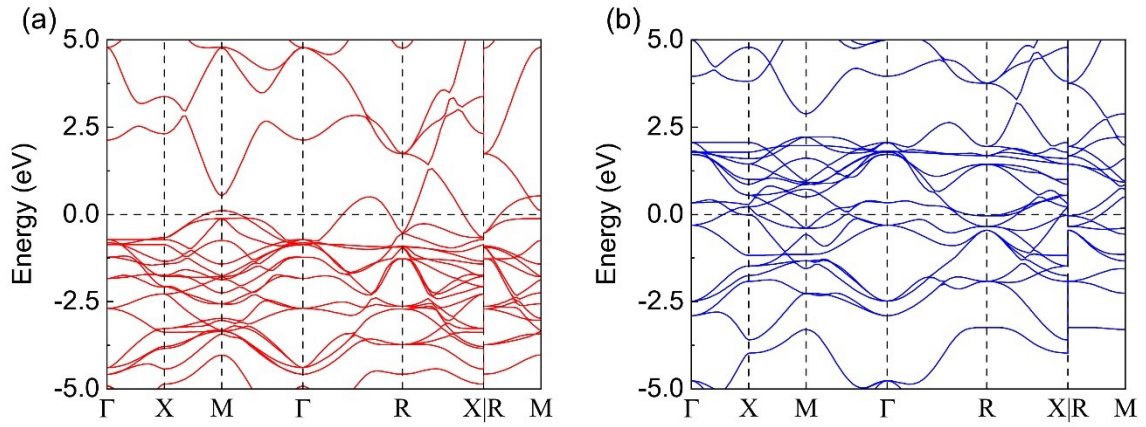

Fig. S3 The band structures of  $\gamma'$ -Fe<sub>4</sub>N, (a) spin up, (b) spin down.

### S4. The relationship between exchange parameters and atomic distances

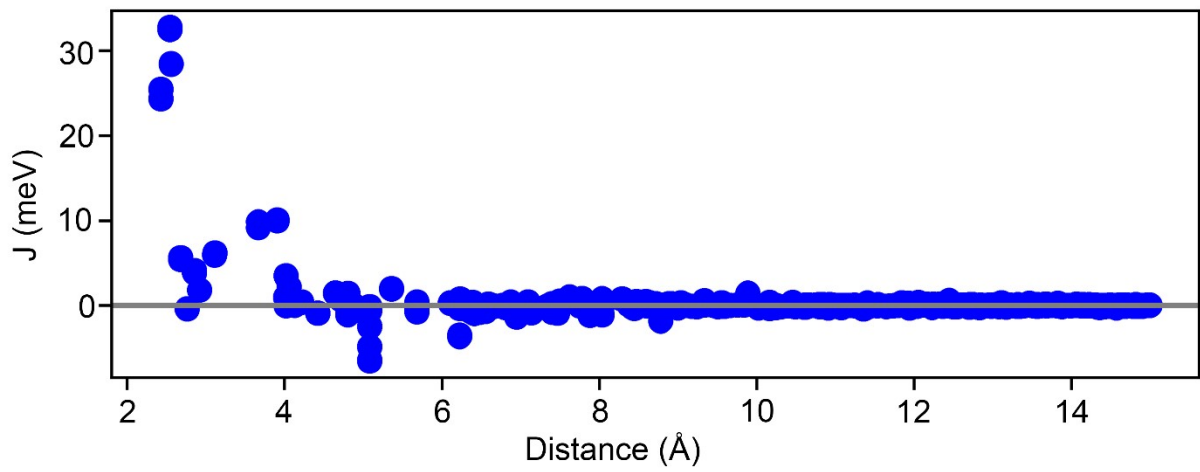

Fig. S4 The relationship between exchange parameters and atomic distances
